# Supplementary material for: The Dynamics of the Concentration and Speciation of Arsenic in Private Drinking Water Wells in Eastern Wisconsin, USA
Source: MDPI journal article supplement (doi:10.3390/environments11040075), 2024-04-09
Supplement: s1 [file s1]

# The Dynamics of the Concentration and Speciation of Arsenic in Private Drinking Water Wells in Eastern Wisconsin, USA

Evvan Plank <sup>1</sup>, Yin Wang <sup>2,\*</sup> and Shangping Xu <sup>1,\*</sup>

<sup>1</sup> Department of Geosciences, University of Wisconsin–Milwaukee, Milwaukee, WI 53201, USA; egplank@uwm.edu

<sup>2</sup> Department of Civil and Environmental Engineering, University of Wisconsin–Milwaukee, Milwaukee, WI 53201, USA

\* Correspondence: wang292@uwm.edu (Y.W.); xus@uwm.edu (S.X.); Tel.: +1-414-251-6446 (Y.W.); +1-414-229-6148 (S.X.)

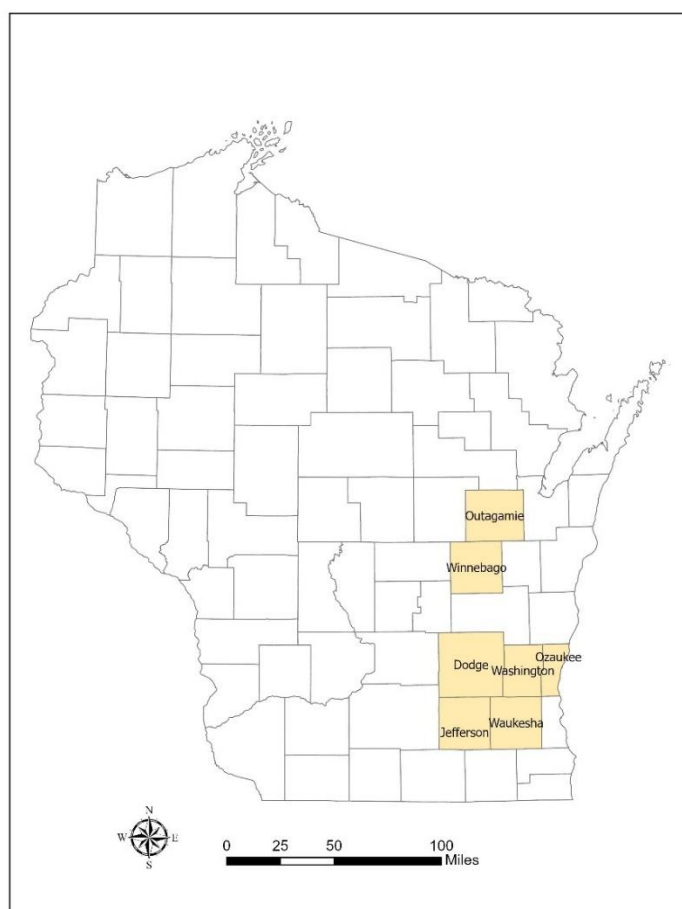

**Figure S1.** The map of counties within Wisconsin where the research was performed.

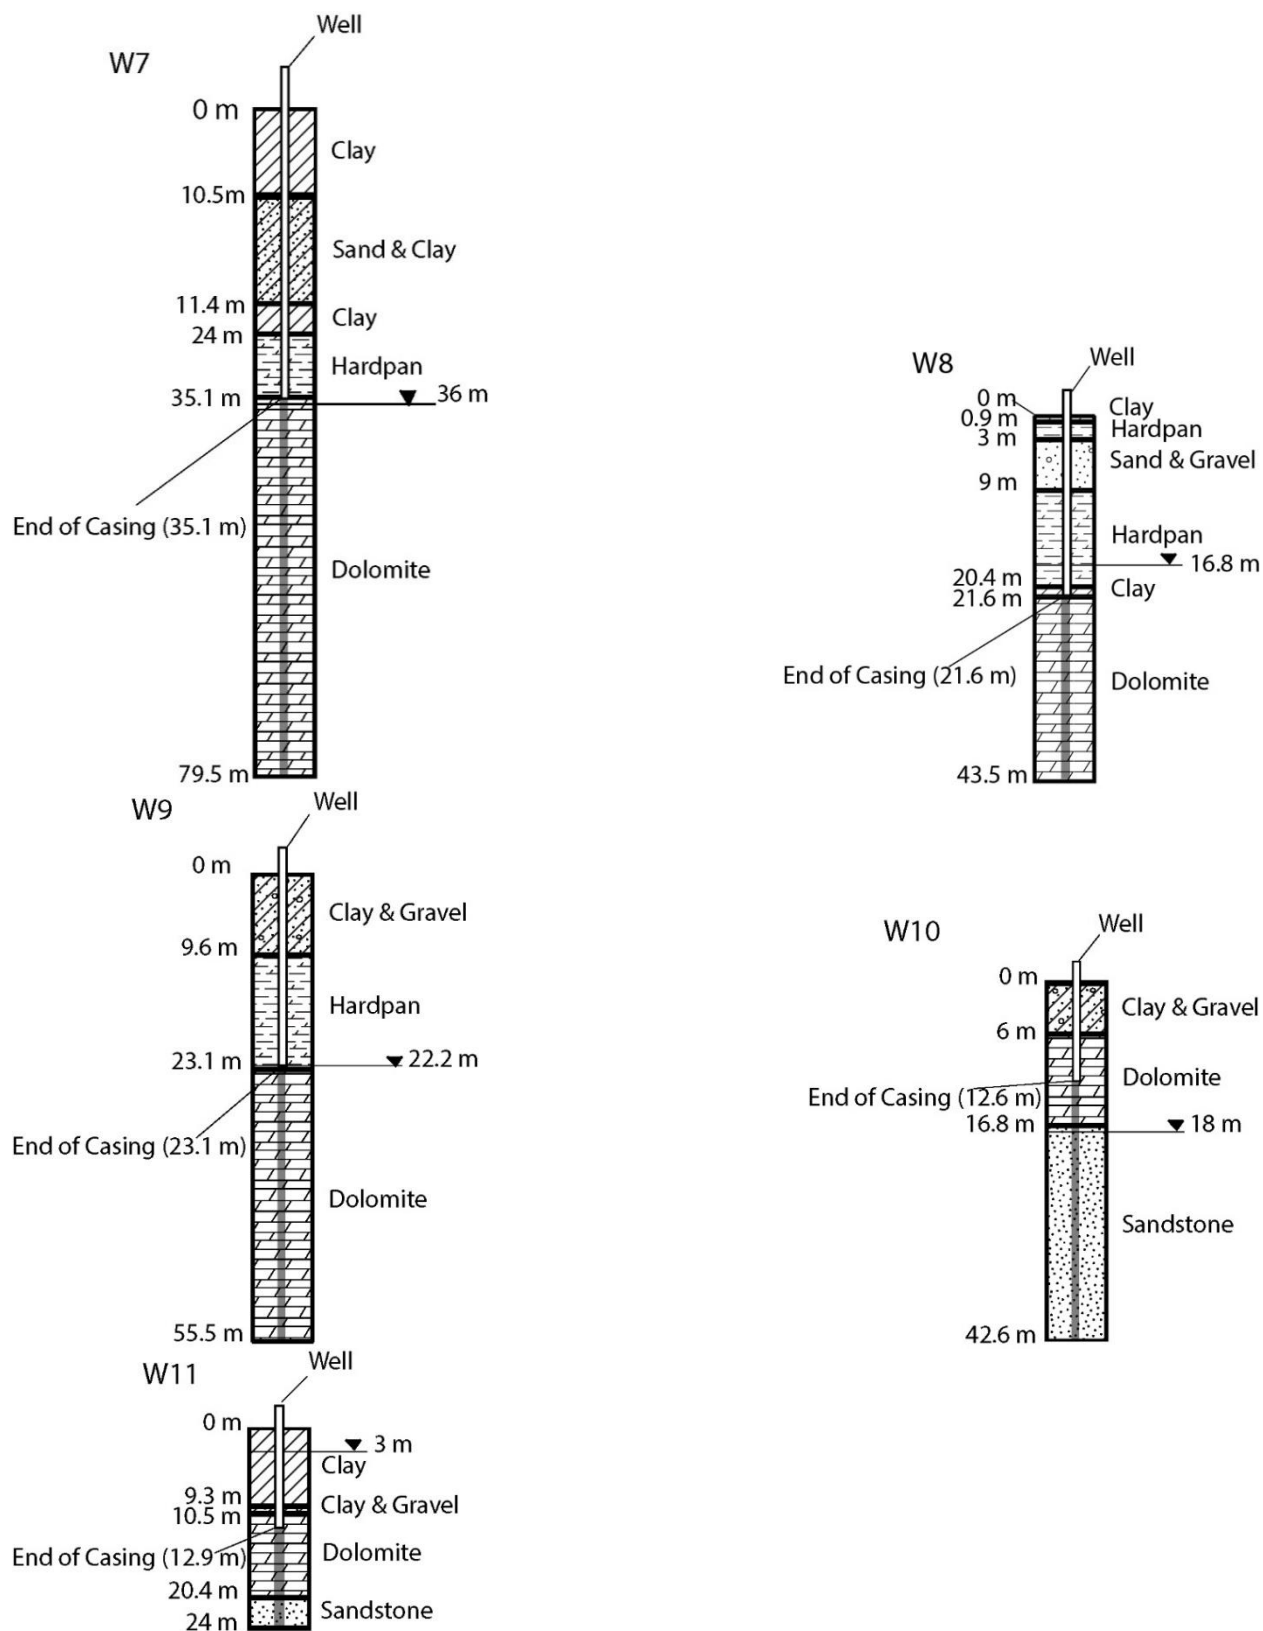

**Figure S2.** Boring log reports for wells W7 – W11 that were studied in this research.

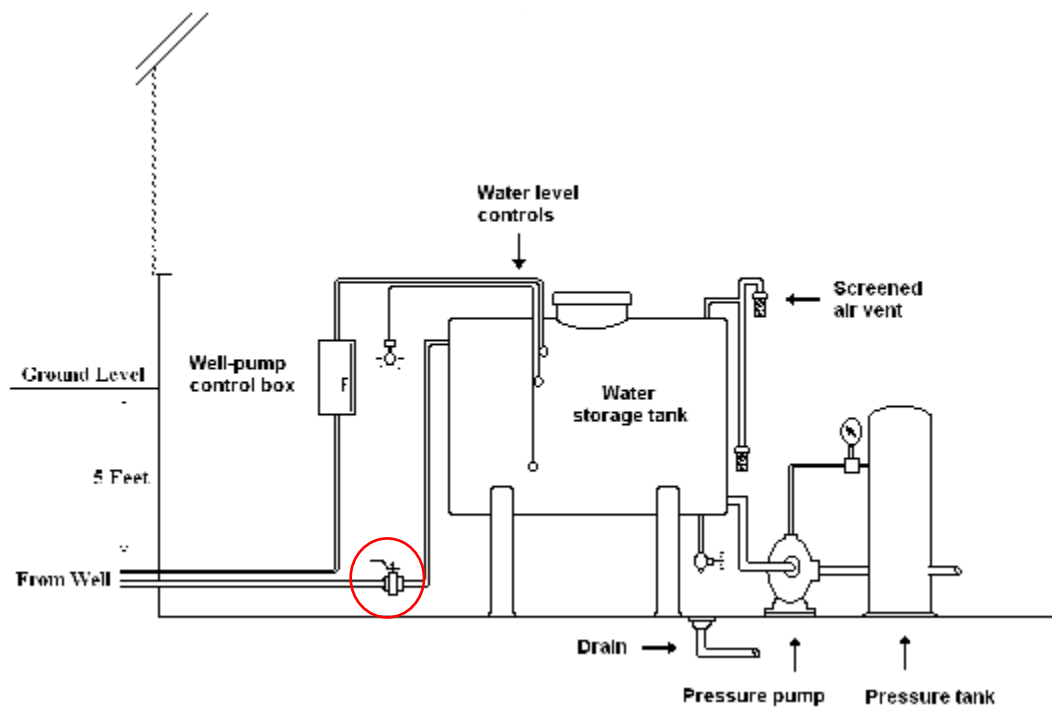

**Figure S3.** Illustration of private well water supply system and the location of water sample collection (Source: [39]). The spigot is highlighted with the red circle.

**Table S1.** Background water quality results for the selected 11 wells ( $n=3$ , except for bicarbonate measurements). BDL means below detection limit. NA means not available. For  $\text{NaHCO}_3^-$ , only one measurement was performed due to time limit. The average ratio of cations and anions charges was 91.2%.

| Well # | pH              | Specific conductivity ( $\mu\text{S}/\text{cm}$ ) | Temperature ( $^{\circ}\text{C}$ ) | Eh (mV)             | $\text{Ca}^{2+}$ (mg/L) | $\text{Mg}^{2+}$ (mg/L) | $\text{K}^{+}$ (mg/L) | $\text{Na}^{+}$ (mg/L) | $\text{Cl}^{-}$ (mg/L) | $\text{NaHCO}_3^{-}$ (mg/L) | $\text{NO}_3^{-}$ (mg/L) | $\text{PO}_4^{3-}$ (mg/L) | $\text{SO}_4^{2-}$ (mg/L) |
|--------|-----------------|---------------------------------------------------|------------------------------------|---------------------|-------------------------|-------------------------|-----------------------|------------------------|------------------------|-----------------------------|--------------------------|---------------------------|---------------------------|
| W1     | 7.44 $\pm$ 0.01 | 1224.75 $\pm$ 38.53                               | 11.6 $\pm$ 0.3                     | -285.90 $\pm$ 8.64  | 80.36 $\pm$ 3.03        | 46.93 $\pm$ 1.49        | 0.93 $\pm$ 0.25       | 0.55 $\pm$ 0.03        | 23.17 $\pm$ 2.32       | 595                         | BDL                      | BDL                       | 51.74 $\pm$ 4.16          |
| W2     | 7.77 $\pm$ 0.03 | 332.85 $\pm$ 92.68                                | 11.2 $\pm$ 1.00                    | -285.23 $\pm$ 23.46 | 50.16 $\pm$ 0.96        | 34.20 $\pm$ 0.64        | 1.92 $\pm$ 0.13       | 3.01 $\pm$ 0.10        | 1.52 $\pm$ 1.32        | 206                         | BDL                      | BDL                       | 5.65 $\pm$ 0.41           |
| W3     | 7.23 $\pm$ 0.00 | 1008.50 $\pm$ 49.70                               | 12.6 $\pm$ 1.9                     | -223.80 $\pm$ 0.42  | 69.15 $\pm$ 0.67        | 38.16 $\pm$ 0.12        | 1.67 $\pm$ 0.39       | 0.39 $\pm$ 0.04        | 3.82 $\pm$ 0.64        | 578                         | 0.36 $\pm$ 0.12          | BDL                       | 5.99 $\pm$ 0.37           |
| W4     | 7.00 $\pm$ 0.41 | 941.25 $\pm$ 195.17                               | 12.9 $\pm$ 2.2                     | -247.48 $\pm$ 3.18  | 71.80 $\pm$ 0.61        | 39.89 $\pm$ 0.40        | 0.66 $\pm$ 0.29       | 0.48 $\pm$ 0.01        | 1.89 $\pm$ 0.98        | 562                         | BDL                      | BDL                       | 3.87 $\pm$ 0.71           |
| W5     | 7.85 $\pm$ 0.02 | 857.25 $\pm$ 20.76                                | 10.9 $\pm$ 0.1                     | -303.15 $\pm$ 18.06 | 48.90 $\pm$ 0.17        | 38.59 $\pm$ 1.29        | 2.83 $\pm$ 0.22       | 0.37 $\pm$ 0.01        | 1.10 $\pm$ 0.05        | 626                         | BDL                      | BDL                       | 2.16 $\pm$ 0.02           |
| W6     | 7.36 $\pm$ 0.01 | 1250.75 $\pm$ 437.33                              | 12.9 $\pm$ 0.9                     | -284.83 $\pm$ 8.34  | 79.78 $\pm$ 0.83        | 60.18 $\pm$ 0.54        | 0.39 $\pm$ 0.14       | 2.36 $\pm$ 0.03        | 60.42 $\pm$ 1.32       | 651                         | BDL                      | BDL                       | 54.38 $\pm$ 0.69          |
| W7     | 7.00 $\pm$ 0.00 | 908.50 $\pm$ 2.12                                 | 13.4 $\pm$ 1.3                     | -240.58 $\pm$ 8.28  | 55.75 $\pm$ 4.16        | 54.20 $\pm$ 2.64        | 3.16 $\pm$ 0.43       | 38.73 $\pm$ 0.59       | 37.72 $\pm$ 1.10       | 214                         | BDL                      | BDL                       | 117.72 $\pm$ 3.79         |
| W8     | 7.11 $\pm$ 0.16 | 1415.50 $\pm$ 464.57                              | 12.6 $\pm$ 1.1                     | -251.10             | 107.62 $\pm$ 3.12       | 67.35 $\pm$ 0.32        | 0.77 $\pm$ 0.04       | 6.80 $\pm$ 8.68        | 97.10 $\pm$ 18.89      | NA                          | BDL                      | BDL                       | 67.09 $\pm$ 1.81          |
| W9     | 7.13 $\pm$ 0.89 | 898 $\pm$ 270.11                                  | 12.0 $\pm$ 0.4                     | -286.40             | 64.44 $\pm$ 1.83        | 52.00 $\pm$ 0.35        | 0.18 $\pm$ 0.05       | 4.07 $\pm$ 5.11        | 26.24 $\pm$ 21.06      | NA                          | 1.51 $\pm$ 0.43          | BDL                       | 27.39 $\pm$ 4.81          |
| W10    | 6.88 $\pm$ 0.33 | 807.33 $\pm$ 200.68                               | 12.2 $\pm$ 0.6                     | -299.50 $\pm$ 2.40  | 78.75 $\pm$ 3.94        | 40.47 $\pm$ 1.02        | 0.59 $\pm$ 0.49       | 0.73 $\pm$ 1.18        | 0.76 $\pm$ 0.20        | 635                         | BDL                      | BDL                       | 43.17 $\pm$ 22.85         |
| W11    | 7.31 $\pm$ 0.01 | 1128.00 $\pm$ 25.55                               | 11.9 $\pm$ 0.5                     | -246.85 $\pm$ 7.54  | 79.93 $\pm$ 1.22        | 33.14 $\pm$ 1.35        | 1.24 $\pm$ 0.92       | 0.77 $\pm$ 0.03        | 19.83 $\pm$ 1.19       | 515                         | BDL                      | BDL                       | 55.56 $\pm$ 9.69          |
